# Supplementary material for: Dose-Dependent Effects in Plasma Oncotherapy: Critical In Vivo Immune Responses Missed by In Vitro Studies
Source: MDPI journal article supplement (doi:10.3390/biom13040707), 2023-04-21
Supplement: s1 [file s1]

## Supplementary Information

# Dose-Dependent Effects in Plasma Oncotherapy: Critical In Vivo Immune Responses Missed by In Vitro Studies

Yuanyuan He <sup>1,2,†</sup>, Fanwu Gong <sup>3,†</sup>, Tao Jin <sup>1</sup>, Qi Liu <sup>1</sup>, Haopeng Fang <sup>3</sup>, Yan Chen <sup>4</sup>,  
Guomin Wang <sup>5,6</sup>, Paul K. Chu <sup>6,7,8</sup>, Zhengwei Wu <sup>1,4,\*</sup> and Kostya (Ken) Ostrikov <sup>9</sup>

<sup>1</sup> School of Nuclear Science and Technology, University of Science and Technology of China, Hefei 230026, China

<sup>2</sup> Department of Geriatrics, Division of Life Sciences and Medicine, The First Affiliated Hospital of USTC, University of Science and Technology of China, Hefei 230001, China

<sup>3</sup> Department of Medical Oncology, Division of Life Sciences and Medicine, The First Affiliated Hospital of USTC, University of Science and Technology of China, Hefei 230001, China

<sup>4</sup> Joint Laboratory of Plasma Application Technology, Institute of Advanced Technology, University of Science and Technology of China, Hefei 230026, China

<sup>5</sup> Department of Orthopedics, School of Medicine, Shanghai Tenth People's Hospital, Tongji University, Shanghai 200072, China

<sup>6</sup> Department of Physics, City University of Hong Kong, Tat Chee Avenue, Kowloon, Hong Kong 999077, China

<sup>7</sup> Department of Materials Science and Engineering, City University of Hong Kong, Tat Chee Avenue, Kowloon, Hong Kong 999077, China

<sup>8</sup> Department of Biomedical Engineering, City University of Hong Kong, Tat Chee Avenue, Kowloon, Hong Kong 999077, China

<sup>9</sup> School of Chemistry and Physics and QUT Centre for Biomedical Technologies, Queensland University of Technology (QUT), Brisbane, QLD 4000, Australia

\* Correspondence: wuzw@ustc.edu.cn

† These authors contributed equally to this work.

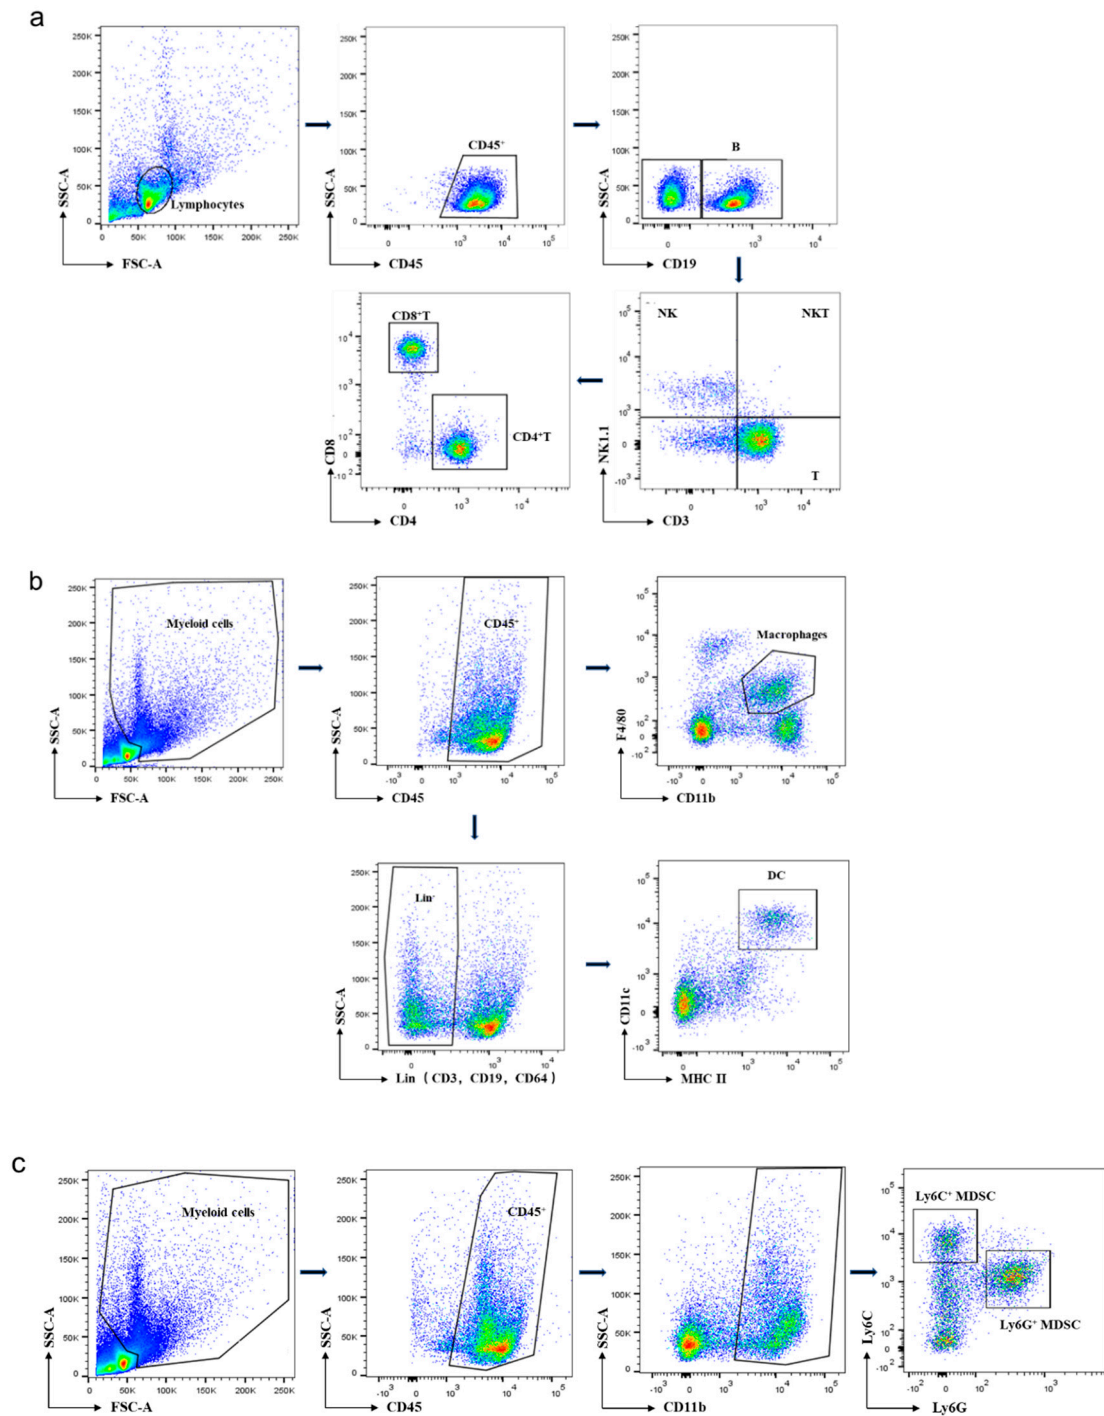

Figure S1. Gating strategies of several immune cell subsets of mice spleen and tumor for flow cytometry analysis: (a) Gating strategies of CD8<sup>+</sup>T, CD4<sup>+</sup>T, B, NK, and NKT cell subsets for flow cytometry analysis, n = 5. (b) Gating strategies of CD8<sup>+</sup>T, CD4<sup>+</sup>T, B, NK, and NKT cell subsets for flow cytometry analysis, n = 5. In DCs gating, Lin<sup>-</sup>

(CD3<sup>-</sup>, CD19<sup>-</sup>, CD64<sup>-</sup>) excludes the T, B cell and macrophage subsets. (c) Gating strategies of total MDSC, Ly6G<sup>+</sup>MDSC, and Ly6C<sup>+</sup>MDSC subsets for flow cytometry analysis, n = 5. The adhesive cells are removed and the dead cells are stained with DAPI prior to analyzation of the cell surface markers. The data are acquired from 5 biologically independent animals.

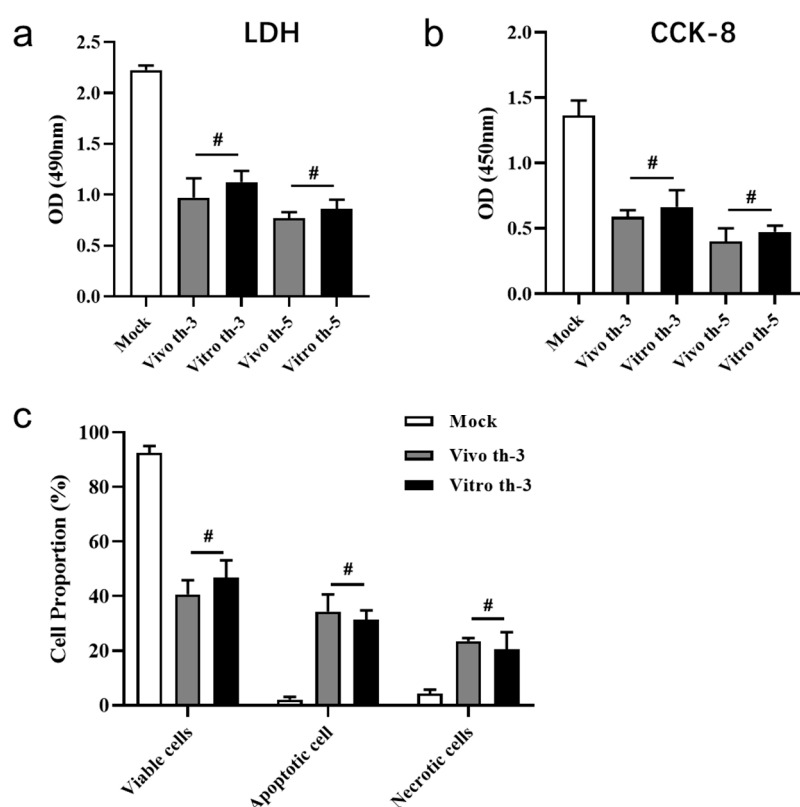

Figure S2. Cytotoxicity and apoptosis of MC38 cells induced by the CAP *in vivo* and *in vitro* devices. The MC38 cells were normally cultured (Mock) or treated with CAP for three days using both the CAP *in vivo* and *in vitro* devices. In the CAP treatment, the MC38 cells were treated by the CAP *in vivo* or *in vitro* devices for 3 or 5 minutes per day for 3 consecutive days. (a, b) LDH and CCK-8 assays of the MC38 cells

suspensions in the control group (Mock) and PT groups,  $n = 5$ . (c) Flow cytometry analysis of the apoptotic and necrotic MC38 cells percentages in the Mock and th-3 PT group using Annexin-V/PI staining,  $n = 3$ .

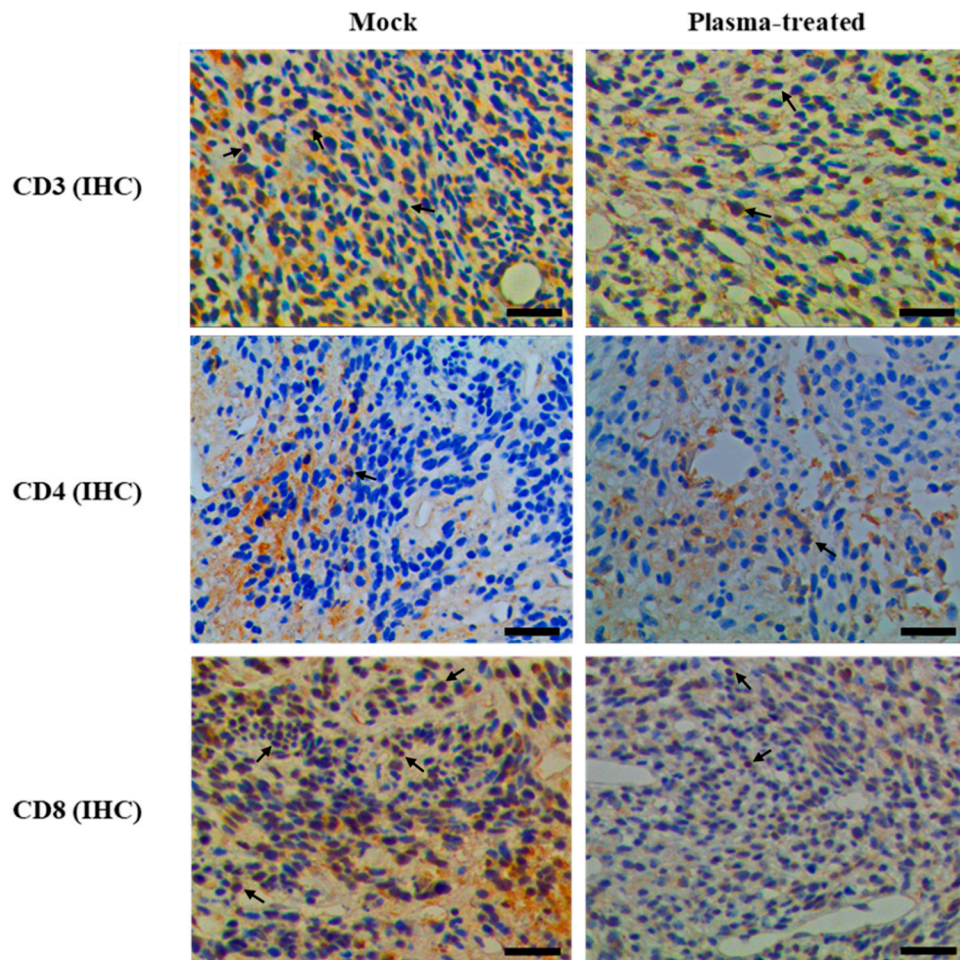

Figure S3. Immunohistochemistry (IHC) staining of CD3, CD4 and CD8 in the tumor tissues of control and PT mice. Immunohistochemical (IHC) staining of CD3, CD4, and CD8 in the serial sections from tumor tissues of the control and PT mice. The arrows indicate the CD3<sup>+</sup>, CD4<sup>+</sup>, and CD8<sup>+</sup> T cells. Scale bars are 50  $\mu$ m. The data are acquired from 5 biologically independent animals.



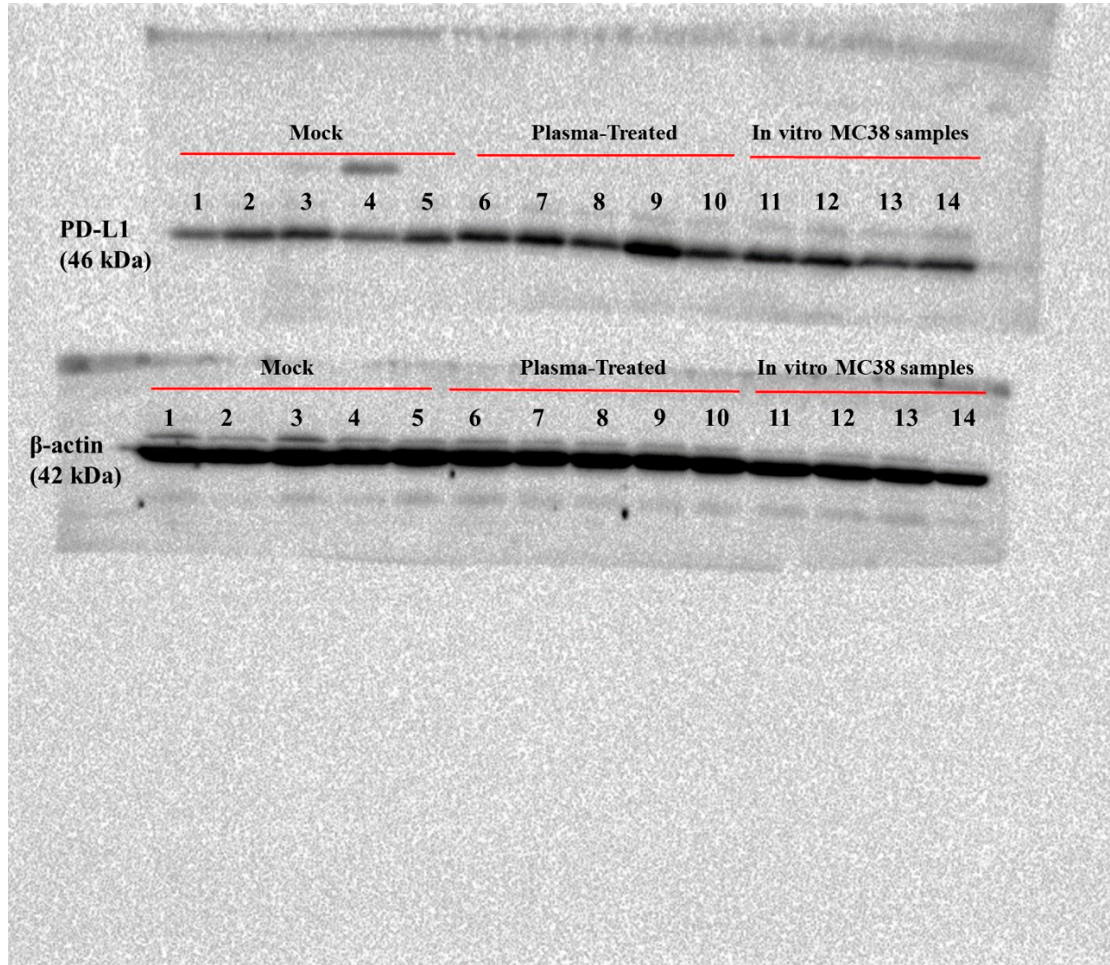

Figure S4. Original image of Figure 5C. Western Immunoblot (WB) analysis to determine the PD-L1 expression in the tumor tissues of the control and PT group mice. Lane 1-5: WB samples of tumor tissues in the control group mice (mock, n=5); Lane 6-10: WB samples of tumor tissues in the PT group mice (Plasma-Treated, n=5); Lane 11-14: WB samples of in vitro MC38 cell samples of control (Lane 11-12) and Th-3 (Lane 13-14) group, not shown in Figure 5C.

Table S1. Primers for the q-PCR analysis in this study.

| Genes    | Primer sequence(5'to3')   | Product length (bp) |
|----------|---------------------------|---------------------|
| PD1      | F: TGCCCTAGTGGGTATCCCTG   | 22.00               |
|          | R: AAGGCTCCTCCTTCAGAGTG   | 22.00               |
| PD-L1    | F: GTCACCTGCTACGGGCGTTT   | 22.00               |
|          | R: CCCAGTACACCACTAACGCA   | 22.00               |
| PD-L2    | F: GTGCTGGGTGCTGATATTGAC  | 23.00               |
|          | R: AAAATCGCACTCCAGGCTCA   | 22.00               |
| CTLA-4   | F: TGGGTTTTACTCTGCTCCCTG  | 23.00               |
|          | R: GTCACCTGTATGGCTTCAGAG  | 23.00               |
| CD80     | F: TTTCAGACCGGGGCACATAC   | 22.00               |
|          | R: GGGGGTAGAGAAGTCAGCTTT  | 23.00               |
| CD86     | F: GTGATCTTCGGAATGCTGCT   | 23.00               |
|          | R: CTCCACGGAAACAGCATCTGAG | 24.00               |
| Tim3     | F: AGACATCAAAGCAGCCAAGGT  | 23.00               |
|          | R: TCCGTGGTTAGGGTCTTGG    | 22.00               |
| Galectin | F: GGGGCGCAAACAGAAACTC    | 20.00               |
|          | R: CTTGGACGGGTAAAGCCCAT   | 20.00               |
| Lag3     | F: GGGGACTTCTCTCTGTGGTTG  | 21.00               |
|          | R: GGACTAGCAATCATCGAGGC   | 20.00               |

Table S2. Antibodies for flow cytometry, immunoblot analysis, IHC, and IF assays.

| Antibodies               | Catalog number | Manufacturer   | Application | References (doi)              |
|--------------------------|----------------|----------------|-------------|-------------------------------|
| CD3-PE                   | 100308         | Biologend      | FCM         | 10.1016/j.vaccine.2014.02.038 |
| CD19-PE                  | 115508         | Biologend      | FCM         | 10.1016/j.immuni.2018.12.011  |
| CD64-PE                  | 558455         | BD             | FCM         | 10.4049/jimmunol.170.5.2549   |
| Ly6G-PE                  | 561104         | BD             | FCM         | 10.1158/0008-5472             |
| CD69-FITC                | 104505         | Biologend      | FCM         | 10.1182/blood-2007-07-103200  |
| MHC II-FITC              | 107605         | Biologend      | FCM         | 10.1084/jem.20101574          |
| Ly6C-FITC                | 128005         | Biologend      | FCM         | 10.4049/jimmunol.1402210      |
| CD8 $\alpha$ -APC        | 100711         | Biologend      | FCM         | 10.1182/blood-2009-04-214718  |
| F4/80-APC                | 123115         | Biologend      | FCM         | 10.1038/s41596-021-00644-9    |
| Gr1-APC                  | 108411         | Biologend      | FCM         | 10.1158/0008-5472             |
| CD45-PE-Cy5              | 103132         | Biologend      | FCM         | 10.1038/s41596-021-00644-9    |
| NK1.1-PE-Cy7             | 108713         | Biologend      | FCM         | 10.4049/jimmunol.180.12.7818  |
| CD11c-PE-Cy7             | 117318         | Biologend      | FCM         | 10.1182/blood-2014-04-568956  |
| CD3-APC-Cy7              | 100330         | Biologend      | FCM         | 10.1016/j.vaccine.2014.02.038 |
| CD11b-APC-Cy7            | 101226         | Biologend      | FCM         | 10.1038/nm.2159               |
| CD4-BV510                | 563106         | BD             | FCM         | 10.1182/blood-2008-04-153866  |
| PD-1                     | ab52587        | Abcam          | IHC         | 10.1038/s41586-021-03362-0    |
| PD-L1                    | 66248-1-Ig     | Proteintech    | IHC/IF      | 10.1016/j.ccell.2020.02.006   |
| CD3                      | 17617-1-AP     | Proteintech    | IHC         | 10.1038/s41467-019-11893-4    |
| CD4                      | 67786-1-Ig     | Proteintech    | IHC         | 10.3389/fimmu.2022.1042072    |
| CD8 $\alpha$             | ab209775       | Abcam          | IHC         | 10.1126/sciadv.aax3160        |
| HRP-Goat anti-Rabbit IgG | 111-035-003    | Jackson Immuno | IHC         | 10.1126/sciadv.adg1036        |
| CY3-Goat anti-Rabbit IgG | SA00009-2      | Proteintech    | IF          | 10.1038/s41586-018-0010-9     |
| PD-L1                    | 66248-1-Ig     | Proteintech    | WB          | 10.1016/j.cell.2020.05.028    |
| $\beta$ -actin           | 20536-1-AP     | Proteintech    | WB          | 10.1038/s41586-022-05499-y    |
| HRP-Goat anti-Mouse IgG  | SA00001-1      | Proteintech    | WB          | 10.1038/s41592-021-01182-8    |
